# Supplementary material for: R9AP is a functional receptor for Epstein-Barr virus infection in both epithelial cells and B cells
Source: Research Square preprint supplement (doi:10.21203/rs.3.rs-113641/v1), 2020-12-02
Supplement: Supplementary file 1 [file 407b046f85a48af6fc98f834.xlsx]

## Sheet: Sheet1
ProbeName	[2B](normalized)	[2Bsp](normalized)	[5B](normalized)	[5Bsp](normalized)	GeneSymbol		fold change
A_23_P128235	2.24008	14.1927	4.27404	14.4623	KRT1
A_23_P164504	1.23962	10.413	1.26503	10.1444	DSG1
A_23_P331098	1.52608	9.24587	2.09683	11.2744	KRT78
A_23_P100240	4.43432	13.1121	4.34417	12.1005	CDH16
A_23_P41145	4.69353	13.0011	5.86327	13.418	FAM3D
A_23_P115202	5.32867	12.4617	9.76147	17.486	CRNN
A_23_P144126	3.77122	9.72003	1.4884	9.93201	FETUB
A_23_P87709	4.39964	12.3129	6.28006	12.6374	PLBD1
A_23_P43197	4.51772	13.3869	3.58026	8.83308	CALB1
A_23_P145555	1.96699	9.0381	1.2931	8.25648	C6orf142
A_32_P387648	2.48802	7.23488	4.84065	13.6193	FLG
A_32_P167076	5.75185	12.6799	8.80621	14.7061	CAPN14
A_23_P105862	1.9911	8.66839	1.77158	7.6898	FRY
A_23_P312150	6.13142	13.8741	7.04537	11.8112	EDN2
A_23_P159764	5.22756	11.3646	2.20716	8.53658	POF1B
A_23_P65618	7.28101	14.6093	11.0381	16.0433	TGM1
A_23_P254654	6.20699	12.5696	7.30137	13.127	CLIC3
A_24_P245838	5.10015	11.1604	6.28272	11.8966	MGAT3
A_23_P25086	3.73873	9.27326	4.19368	10.1209	SDR-O
A_24_P497524	1.27532	7.54889	1.24564	6.33786	LINC01206
A_24_P250815	4.34825	9.99741	1.43268	7.14298	POF1B
A_23_P169017	3.58693	10.0771	7.3683	11.6376	DEFB103A
A_23_P163567	5.61025	10.2944	6.52225	12.4839	SMPD3
A_23_P12767	1.23495	5.41667	1.26846	7.59937	CYP2C9
A_24_P85850	3.25551	8.62682	3.31045	8.44845	BNIPL
A_24_P262127	5.46204	9.96598	3.36939	9.21446	RRAD
A_23_P28834	7.04001	12.3178	8.76024	13.6082	PHACTR3
A_23_P37088	5.56062	9.49238	3.38499	9.45068	RDH12
A_24_P256722	3.84754	9.44383	5.04783	9.34019	CNGA1
A_23_P387656	1.36298	5.68852	1.44486	6.6345	EPB41L4B
A_23_P94186	3.94674	7.42203	4.79772	10.7603	LYPD2
A_23_P115478	1.71215	6.78719	4.4248	8.78538	PADI1
A_23_P201248	3.46146	7.64634	4.0245	9.23498	SLC26A9
A_23_P114597	5.09401	8.39916	8.66336	14.7172	SPRR2G
A_23_P373742	1.33717	7.0949	1.37758	4.95179	TRIML1
A_24_P269527	6.25605	9.73703	5.93004	11.5917	SLURP1
A_23_P213832	10.0198	13.4711	10.4448	16.1162	SPINK7
A_24_P347310	2.48509	6.64926	3.0767	7.9997	P11
A_23_P68436	4.73383	8.0265	5.67949	11.4687	WFDC12
A_23_P137665	2.29131	7.28186	3.67148	7.75817	CHI3L1
A_32_P141682	4.97459	9.46412	6.35111	10.9368	EVPLL
A_23_P151915	6.56999	11.0386	7.89636	12.4646	GCNT3
A_23_P144417	6.80635	11.2595	7.71002	12.2586	TMPRSS11D
A_23_P101246	9.11322	13.326	9.50422	14.2902	VSIG10L
A_23_P91970	1.28992	5.71634	1.37138	5.93407	AADACL2
A_23_P215634	6.43612	11.8052	9.6159	13.1996	IGFBP3
A_23_P120281	1.31869	5.59395	2.07801	6.73211	EDAR
A_23_P10025	2.58628	6.8805	1.31908	5.82592	NELL2
A_23_P154150	1.71101	6.40348	2.66657	6.57804	GPR1
A_32_P83811	2.64356	6.34938	1.95363	6.68782	FAM47E
A_24_P925505	1.59941	5.12392	1.53101	6.32874	CD36
A_24_P406525	1.35412	5.3081	1.50182	5.72719	ChGn
A_23_P138524	1.396	5.30007	3.27756	7.37329	CPXM2
A_23_P11644	9.4564	12.7334	12.4542	17.1474	SPRR2D
A_24_P923723	2.79984	3.93934	2.35053	9.15394	SLC38A10
A_32_P465742	1.66195	6.92802	2.54176	5.16347	PIP5K1B
A_24_P586712	7.46833	11.9268	8.52063	11.8496	FAM79B
A_23_P126089	10.4392	13.4398	12.9249	17.5073	SPRR2C
A_24_P331150	1.52009	5.58215	1.9439	5.41769	CYP4F22
A_23_P76743	5.03	8.91279	5.37779	9.00595	ASPG
A_32_P83098	1.50723	5.60051	1.97861	5.3757	SCNN1B
A_32_P196263	2.04137	4.88076	4.83103	9.27578	ADAMTS9
A_23_P35414	9.65896	13.8672	9.25798	12.307	PPP1R3C
A_23_P117992	8.17087	11.8569	7.06407	10.6245	ATP2C2
A_23_P140373	2.50878	5.65487	2.10189	6.09281	FLVCR2
A_23_P420209	2.11519	4.95063	1.44589	5.73565	GCNT3
A_24_P941339	1.36509	7.60711	5.8541	6.67235	KCNE1
A_24_P257224	2.29366	6.7607	1.3351	3.81916	TPO
A_23_P502060	3.18091	6.59002	4.28187	7.68806	AQP6
A_23_P146146	4.24527	9.5323	4.58909	5.8535	ATP6V0D2
A_23_P152406	9.99156	13.6809	10.3313	13.078	CAPNS2
A_23_P71480	8.08333	10.7102	6.03175	9.75027	DEFB1
A_23_P155804	1.35915	4.96018	2.28242	4.99951	GNRHR
A_24_P113458	2.65613	6.33737	2.86304	5.41844	CDH26
A_32_P227605	3.62887	6.35039	3.46704	6.87319	RGS9BP
A_23_P312300	1.4059	6.90769	7.70294	8.32447	SCGB2A1
A_23_P426565	6.34478	8.5524	6.31209	10.0343	C17orf55
A_23_P160159	4.03676	6.84376	4.26775	7.38523	SLC2A5
A_23_P71268	4.28779	6.78504	6.18383	9.60125	AZGP1
A_32_P219460	3.61704	5.53503	3.98002	7.86606	PDZRN3
A_24_P788878	1.94551	7.28268	6.23382	6.69223	NLF2
A_23_P75024	3.37595	5.67735	1.37655	4.86199	MSMB
A_23_P56369	6.65517	9.47426	7.19048	10.1573	ABCA12
A_24_P12136	3.56274	5.53476	1.34302	5.1213	S100Z
A_24_P37589	1.47494	4.80281	1.68484	4.10679	ACPP
A_32_P184464	6.26778	10.6732	5.07912	6.38674	ROPN1
A_23_P49975	14.6844	16.9713	14.5932	17.9913	KRT10
A_23_P51690	6.00778	8.83964	6.36759	9.19269	RHBG
A_23_P50517	2.65403	5.58059	2.98977	5.71023	ZNF541
A_32_P1838	2.26922	6.98706	2.9919	3.86196	LOC100507663
A_23_P94275	2.94968	5.41769	2.54248	5.64252	DKK4
A_24_P119201	2.74092	5.99492	2.04375	4.34984	MBD2
A_23_P31407	9.83112	14.0126	9.63002	10.9387	AGR2
A_23_P149171	3.94	6.43369	4.07442	7.05337	FAM63A
A_32_P509964	2.9919	3.94913	1.41014	5.91144	TRAF3IP2-AS1
A_23_P328545	5.95388	9.65047	6.36432	8.07225	GABRP
A_24_P915492	2.60433	4.96645	2.20974	5.15693	INPP4B
A_32_P107219	4.68907	7.39647	1.39279	3.96067	SSBP2
A_24_P410797	7.1332	9.93629	7.49157	9.94059	KALRN
A_23_P365267	4.68951	7.08278	1.97518	4.72847	SNED1
A_23_P155979	2.0965	3.95057	1.43204	4.72088	EGF
A_23_P5703	3.0912	6.87971	3.76338	5.0815	LYG2
A_32_P16918	2.45497	4.14031	2.75333	6.05083	C21orf62
A_23_P80162	2.10474	4.92741	2.65519	4.68441	TMPRSS3
A_24_P929449	5.51573	9.53751	5.2158	6.03568	ANKRD11
A_24_P135427	6.78805	10.14	7.09695	8.55631	LOC100128398
A_24_P333697	3.55974	6.26099	4.64411	6.72563	KLK13
A_23_P66311	5.97188	10.4342	5.60924	5.9241	DNASE1
A_23_P15101	3.70463	5.58744	3.95733	6.73027	TMC5
A_23_P420692	6.12558	9.51269	7.40861	8.66431	PPFIA4
A_23_P145514	4.19673	7.29885	2.25837	3.75174	IL20RA
A_23_P101054	4.45391	6.59612	7.59551	10.0064	KRT34
A_24_P28722	1.58646	5.31555	4.23671	5.05842	RSAD2
A_23_P422144	2.52176	6.30074	4.77901	5.52897	FAM43A
A_24_P236935	4.89173	7.28456	6.42394	8.55776	KLK6
A_23_P152970	6.63308	9.82579	7.85533	9.17784	RAPGEFL1
A_23_P50697	2.39244	4.12641	2.57335	5.31678	PSG1
A_32_P211253	8.23471	10.7046	8.51523	10.5122	LINC01405
A_23_P48988	8.0608	9.69219	7.11059	9.90056	SH3GL3
A_23_P214079	3.89655	7.45465	3.97055	4.82296	SPINK1
A_24_P3415	8.5169	11.6171	9.89115	11.1701	PPP2R2C
A_23_P43337	3.54505	6.15161	3.97933	5.72882	FREM1
A_24_P105933	4.97336	7.82235	6.96849	8.47089	VIPR1
A_23_P214935	3.60293	6.58276	4.93074	6.15435	VNN3
A_23_P256205	9.64267	12.0427	9.96141	11.7525	ABLIM3
A_24_P40626	3.48103	3.94415	3.27447	6.98888	GREM2
A_23_P23611	8.02404	10.1915	7.5257	9.51172	AMY1C
A_23_P65307	11.975	12.8951	9.47832	12.6906	SLITRK6
A_23_P54968	7.59681	9.6962	9.18297	11.1924	ST6GALNAC1
A_23_P26325	6.02542	7.55591	6.04401	8.60998	CCL17
A_32_P204676	12.1361	14.1561	11.5788	13.6329	FABP5
A_23_P122724	5.58148	8.47848	5.67405	6.78828	VNN2
